# Supplementary material for: An Ancient Lineage of Highly Divergent Parvoviruses Infects both Vertebrate and Invertebrate Hosts
Source: PubMed Central journal article supplement (PMC6631224; doi:10.3390/v11060525), 2019-06-06
Supplement: viruses-11-00525-s001.pdf [file viruses-11-00525-s001.pdf]

# A

Mouse kidney parvovirus NP

```

1 M L P G A S V L K K K R C L E I E E C T F S P G L K I C H I H H L F A E L V N I A A N A A F V K Q V E 50
51 A A R L V L V G N Q L A A C R E R N N P P F Q N H F S P N P R Q A M F Q P D P C L Y L E K K H H Y L Q 100
101 Q K V S G A T T S D I A A V Q E G S R S N A P T A Q D L A A A P A P Q L A T A Y D P V G N T D P A I 150
151 P E Q E Y H V P S P G A L S V W S P L S L E E T M E M I S Q E I E W E N L Q A Q I A R Q V A Q I L A 200
201 D L E E N A D I A K K W H C W G K P K A K K H G I R F Q P P S Q A W V G I W A P
  
```

ChPV.2-Latroectus hesperus NP

```

1 L P L Y S L T P L S Y F T G K S I A T T V K S A L N L V A N A I P S A A R A V E T A L N I V G R P D 50
51 V A A S V Q T A A T S V A S A I H G V Q L I Q E T V Q S V P A F L T E A S N L L S G S S T K S G T D 100
101 A A V A R T G Q G L S I Q D L Q A L T H P Q L M T P F D Y A V N T D P A I P A D R E R S P S N Q R R 150
151 K M S H V H P E E I T K E I D L I L Q D E I T P Q S Y D V Y M D T V E E L Q H L L R V P N R L I I Q 200
201 Y G D P Q S Y P Y K L T L K K P A N H I N K L V N S
  
```

KEY  
 Annotations Helix Sheet Disordered Disordered protein binding

# B

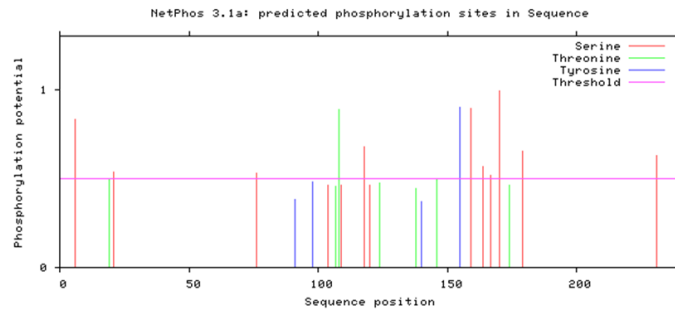

Mouse kidney parvovirus NP

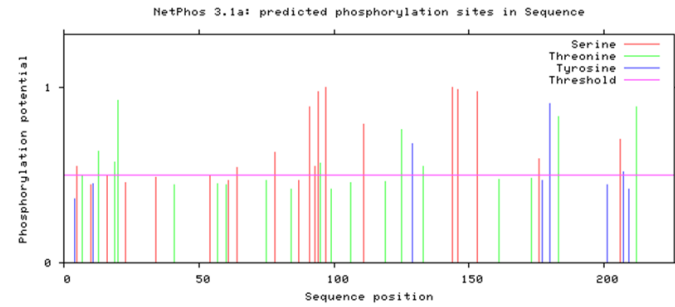

ChPV.2-Latroectus hesperus NP

## Figure S1

Predictions of secondary structure, disordered regions and potential phosphorylation sites in case of an amniote exogenous and an endogenous invertebrate chapparvovirus nucleoprotein (NP). (A) Secondary structure and disordered region predictions of NP from mouse kidney parvovirus and from the element ChPV.3-Latrodectus hesperus. (B) Predictions of potential phosphorylation sites in case of the same amniote chapparvovirus and an invertebrate endogenous chapparvoviral element NPs.

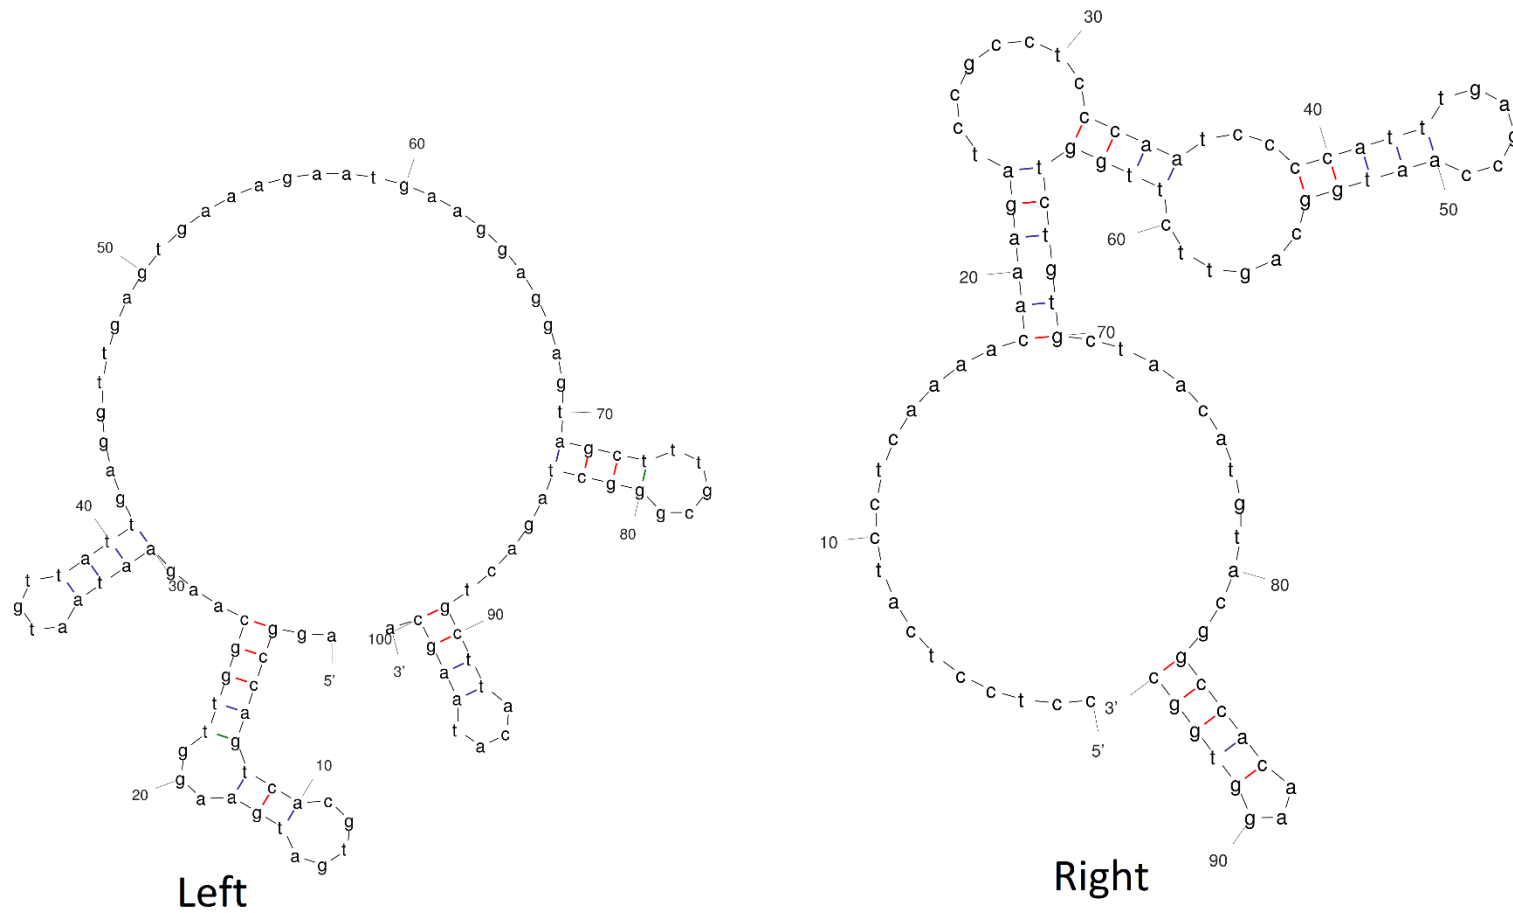

**Figure S2**

Secondary structure predictions of the *Syngnathus scovelli* chapparvovirus genome termini.

**A**

|                 |     | VR1                                       |                                                                      |                        |                                          |                                                   |                                                                            |                                                           |                              |       |     |      |     |     |     |   |   |   |   |   |   |     |
|-----------------|-----|-------------------------------------------|----------------------------------------------------------------------|------------------------|------------------------------------------|---------------------------------------------------|----------------------------------------------------------------------------|-----------------------------------------------------------|------------------------------|-------|-----|------|-----|-----|-----|---|---|---|---|---|---|-----|
| murine_ChPV_NY  | 1   | MAEDVTFHNTYMVYWKNPFIYPNTNINPPN--AHTMSAG   | INTGWHIIPTILWKHF                                                     | LTPKQWTEFTIN           | FEAYTVKGY                                | SCTIYN                                            | 82                                                                         |                                                           |                              |       |     |      |     |     |     |   |   |   |   |   |   |     |
| MKDV            | 1   | MAEDVTFHNTYMVYWKNPFIYPNTNINPPN--AHTMSAG   | INTGWHIIPTILWKHF                                                     | LTPKQWTEFTIN           | YEAYTVKGY                                | SCTIYN                                            | 82                                                                         |                                                           |                              |       |     |      |     |     |     |   |   |   |   |   |   |     |
| rat2            | 1   | MATDVSFSNVFMAYWSNSPYNYKVSGAGRDH--T-RPTGTP | INTGWHILPLTLWKHF                                                     | TAKQWAE                | LVINYEAY                                 | TVKGF                                             | SCTVYN                                                                     | 81                                                        |                              |       |     |      |     |     |     |   |   |   |   |   |   |     |
| Desmodus_rotond | 1   | MAEDVSYTNTYMAYWKNQPYIYPNNDTDPKSKTGOVMSTGE | INTGWHIIPTILWKHF                                                     | TTPKQWCNFM             | IKYEAY                                   | TVKGY                                             | TVTVYN                                                                     | 84                                                        |                              |       |     |      |     |     |     |   |   |   |   |   |   |     |
| porcine7        | 1   | MAEHITLSNTFMAYWENDPYQYPTYKPFQKN-----EIL   | TSNTGWHILLN                                                          | LWRHF                  | LSPKQWYEL                                | CINYEAY                                           | HVEGT                                                                      | STTVFN                                                    | 78                           |       |     |      |     |     |     |   |   |   |   |   |   |     |
| turkey2         | 1   | MADDISFSHSYMCYIKNQPYLYPTQKNPTMP-----QEST  | LNTGWHIIPT                                                           | TLWKHF                 | CTPADW                                   | VDLITHYEAY                                        | SVTGYS                                                                     | SVSIFN                                                    | 78                           |       |     |      |     |     |     |   |   |   |   |   |   |     |
| pit_viper       | 1   | MATDHVFTNTYMCYWENKPYLYPANQPGVKR-----DGDV  | YTTGWHII                                                             | PNML                   | LWRHV                                    | TTPKQWAE                                          | FQIQTEAY                                                                   | HVKS                                                      | IKAI                         | IVYN  | 78  |      |     |     |     |   |   |   |   |   |   |     |
| cons            | 1   | ** . : :* * . * * : *                     |                                                                      |                        | .*****: **:* . . : * : : *** * . . : : * |                                                   | 84                                                                         |                                                           |                              |       |     |      |     |     |     |   |   |   |   |   |   |     |
|                 |     | VR2 – DE loop                             |                                                                      | VR3                    |                                          | VR4                                               |                                                                            |                                                           |                              |       |     |      |     |     |     |   |   |   |   |   |   |     |
| murine_ChPV_NY  | 83  | PIPMTQQ <b>LAIQGT</b> TAF                 | TAFNNTIYTLGAQDD                                                      | LYETAYHNWY             | <b>DDATG</b> DYKAF                       | NLSFKEGQYK-----                                   | <b>NE</b> --NGSWK <b>KT</b> M <b>WP</b>                                    | 156                                                       |                              |       |     |      |     |     |     |   |   |   |   |   |   |     |
| MKDV            | 83  | PIPMTQQ <b>LAIQGT</b> TAF                 | TAFNNTIYTLGAQDD                                                      | LYETAYHNWY             | <b>DDSTG</b> DYKAF                       | NLSFKEGQYK-----                                   | <b>NL</b> --SGSWK <b>KT</b> I <b>WP</b>                                    | 156                                                       |                              |       |     |      |     |     |     |   |   |   |   |   |   |     |
| rat2            | 82  | PVPMTQQ <b>LAIQGT</b> TFT                 | TAFNNTIYSLGVKDE                                                      | LYETSWYNW              | ND <b>PAGTGG</b> FNNF                    | SLAYKEGYL-----                                    | <b>DS</b> <b>PR</b> A <b>A</b> T <b>Q</b> K <b>R</b> T <b>L</b> L <b>P</b> | 157                                                       |                              |       |     |      |     |     |     |   |   |   |   |   |   |     |
| Desmodus_rotond | 85  | PIPMTQQ <b>LAIQGT</b> TAF                 | TAFNNTIYTLGAQDD                                                      | IYETSYHNWY             | <b>LDT</b> ---PFNHFN                     | LAYKEGQYK-----                                    | <b>DN</b> --NNSW <b>NK</b> T <b>V</b> F <b>P</b>                           | 155                                                       |                              |       |     |      |     |     |     |   |   |   |   |   |   |     |
| porcine7        | 79  | PIPI <b>TNNLPIQGT</b> S                   | TFTAFNNTIYSLGAS                                                      | DDLYETGYQN             | WY <b>EDT</b> ---L                       | WRSWYVAYKEGLV                                     | <b>PKPTTATKE</b> <b>GV</b> --GNSW <b>SRL</b> T <b>L</b> L <b>P</b>         | 157                                                       |                              |       |     |      |     |     |     |   |   |   |   |   |   |     |
| turkey2         | 79  | MT <b>PM</b> TT <b>QIAIQGT</b> N          | TFTAFNNTIYALGY                                                       | TD <b>EMCET</b> GFFNWY | <b>SS</b> ---EY                          | DSPNLSLHEGLGK                                     | -----                                                                      | <b>RH</b> --DDT <b>S</b> Y <b>R</b> Y <b>E</b> L <b>P</b> | 148                          |       |     |      |     |     |     |   |   |   |   |   |   |     |
| pit_viper       | 79  | PVPMTT <b>QLAIQGS</b> T                   | VFTAFNNTIYSLGY                                                       | TD <b>TLYET</b> DWFN   | WN <b>SPA</b> - <b>SD</b> HI             | DLN <b>L</b> AYKEGLAR                             | -----                                                                      | <b>TV</b> --NG <b>T</b> T <b>T</b> RY <b>I</b> L <b>P</b> | 151                          |       |     |      |     |     |     |   |   |   |   |   |   |     |
| cons            | 85  | *:* : : ** : . . ***** : ** * : ** : **   |                                                                      |                        |                                          |                                                   | : : **                                                                     |                                                           |                              | : : * | 168 |      |     |     |     |   |   |   |   |   |   |     |
|                 |     | VR5                                       |                                                                      | VR6                    |                                          |                                                   |                                                                            |                                                           |                              |       |     |      |     |     |     |   |   |   |   |   |   |     |
| murine_ChPV_NY  | 157 | IYSWR                                     | TENARNASSSTYSY-LNG-----                                              | IDS                    | YAVWPRTKD----                            | KELI                                              | PTGVFWDPLNDANGILELRPGKNSMSFSWEQHPC                                         | 228                                                       |                              |       |     |      |     |     |     |   |   |   |   |   |   |     |
| MKDV            | 157 | IYSWR                                     | TENARNASSSTYSY-LNG-----                                              | IDS                    | YAVWPRTKD----                            | KELI                                              | PTGVFWDPLNDANGILELRPGKNSMSFSWEQHPC                                         | 228                                                       |                              |       |     |      |     |     |     |   |   |   |   |   |   |     |
| rat2            | 158 | VYYW                                      | KSPTELN                                                              | SVVTWTW-DQEYNSAAAGLIGN | VAVPITGT---NTIS                          | LPDGVFWDPLTSPDDIMELRPGKNSMTWSWERHDC               | 237                                                                        |                                                           |                              |       |     |      |     |     |     |   |   |   |   |   |   |     |
| Desmodus_rotond | 156 | VYSWR                                     | TANPRNVSDTTYSY-IPT-----                                              | VLS                    | YSTWPRVAN---                             | ESDI                                              | PNGLFWDPLTDPDSIMELRPGKNSMSFSWNAHDC                                         | 227                                                       |                              |       |     |      |     |     |     |   |   |   |   |   |   |     |
| porcine7        | 158 | TYLWS                                     | APITAPETNWTWTW-NTNK-PY---                                            | PTAG                   | TWAHTDA-GTEQ                             | VVAPARCFWDPFTNTDSIQELRPGKNAMSFHWKTHAA             | 235                                                                        |                                                           |                              |       |     |      |     |     |     |   |   |   |   |   |   |     |
| turkey2         | 149 | IYLW                                      | PKPHVRVTSQRTMGDWPYN-----                                             | TEGY                   | TTWPKNQNNDDTNGIPTGLI                     | WDPFNMPKMLQELRPGKNAISFSWHPHDC                     | 225                                                                        |                                                           |                              |       |     |      |     |     |     |   |   |   |   |   |   |     |
| pit_viper       | 152 | TYLW                                      | RQ <b>N</b> AR <b>M</b> AS <b>F</b> DS <b>W</b> AT-E <b>P</b> N----- | MSA                    | YPVYPIGGKVSASEGEQPSGV                    | FWDPFNRPNHITELRPGKNAIQYVWENHGC                    | 227                                                                        |                                                           |                              |       |     |      |     |     |     |   |   |   |   |   |   |     |
| cons            | 169 | * *                                       |                                                                      | :                      | :                                        |                                                   |                                                                            | *                                                         | :***: . . : *****: : : * . * | 252   |     |      |     |     |     |   |   |   |   |   |   |     |
|                 |     | VR7                                       |                                                                      |                        |                                          |                                                   |                                                                            |                                                           |                              |       |     |      |     |     |     |   |   |   |   |   |   |     |
| murine_ChPV_NY  | 229 | DENK                                      | WFNIDQIAKWF                                                          | PYTVDTPYLN             | PQ---T-YGPPG                             | SYKLY-GEDDPDQLTTPSSWT-A                           | YSAKN                                                                      | DYTI                                                      | PNLLDMP                      | I     | VP  | MQ   | WFW | 306 |     |   |   |   |   |   |   |     |
| MKDV            | 229 | DENK                                      | WFNIDQIAKWF                                                          | PYTVDTPYLN             | PQ---T-YGPPG                             | SYKLY-GEDDPDQLTTPSSWT-A                           | YSAKN                                                                      | DYTI                                                      | PNLLDMP                      | I     | VP  | MQ   | WFW | 306 |     |   |   |   |   |   |   |     |
| rat2            | 238 | DENK                                      | WYNIDQLAR                                                            | WAPYTADMPV             | WNLG---R-I                               | GGAGSYQPD-DIEDPKSLSGPRYGT-N-PATE                  | DYTI                                                                       | PNLAN                                                     | M                            | I     | VP  | V    | AW  | WWW | 314 |   |   |   |   |   |   |     |
| Desmodus_rotond | 228 | D                                         | TNKWYNLD                                                             | CI                     | AKWTPYVHDN                               | PFQ <b>HIG</b> ---R-AGQAGSYKIT-TTDDPDPLSTYSSWATTE | L                                                                          | KDD                                                       | F                            | T     | I   | PNLL | N   | M   | P   | V | P | M | N | W | W | 306 |

|           |     |                                                                                        |     |
|-----------|-----|----------------------------------------------------------------------------------------|-----|
| porcine7  | 236 | DEHCWYNLDSLVLKLPYTPESGYSHNIREKTYQGPPGTRIVNENFQHPPTQTSISSDQ-S-KVFI EHDV PNIL TAPSVPIHWF | 317 |
| turkey2   | 226 | DQNKWYNLDQIAWWWPYAAPSPYPNNN-----RPQTSQLS-TQCDPDLQSKYE---N-TNPGDYTMPDMSLMPITPTGWWW      | 297 |
| pit_viper | 228 | DDGIWFNMDHIAFSFSPYFGDHPWDSF----S-AGFPGSYKLNQNAADDPEFLSPY-M-T-APTNRNWTIPNLANMPIVPTGWF   | 303 |
| cons      | 253 | * *:*:* :. ** : : * .*                                                                 | 336 |

**VR8**

**HI loop**

|                 |     |                                                                                                    |     |
|-----------------|-----|----------------------------------------------------------------------------------------------------|-----|
| murine_ChPV_NY  | 307 | QEIQKSIAEVPD----VKKPMLYWAGTEYEYKYGPTQC <b>FLKGIPLFDD</b> NDTHVATTTQGCFRISLHLAGKKRRSRIYAPTWG        | 385 |
| MKDV            | 307 | QEIQKSIAEVPD----VKKPMLYWAGTEYEYKYGPTQC <b>FLKGIPLFDD</b> NDTHVATTTQGCFRISLHLAGKKRRSRIYAPTWG        | 385 |
| rat2            | 315 | IEMQKSIVGTYD <b>DNSSPQKEE</b> ALYGPGEYEYKYPTQC <b>FIKGLPLFDD</b> DGNHISTTTQGCFKVTLHLAAKRRSRIYAPTWH | 398 |
| Desmodus_rotond | 307 | QEMQKSIAQTTT----LKKPALFWAGTEYEYKYPTQC <b>FLKGVPLFDD</b> NGTHVETLTQGCFRVTLHLAAKRRSRIYAPTWG          | 385 |
| porcine7        | 318 | IELERNLIEDKK----VEKPOLGWPGTEWATPKYPPMNN <b>FIKGIPLTDE</b> NETLVKTTITMGCFRNGIHLSCKRRSRMFAPTWG       | 396 |
| turkey2         | 298 | KEMQSSIILSPGEY--FSSRPDLFFAGTEYEFKYPTMQH <b>FIKIIPLFDS</b> QGNHIDISANISVRTTLHLKCKRRSAYFCPTYG        | 379 |
| pit_viper       | 304 | KEVKESIALTQDP----TTIPELMAAQTEYQYKYPTQW <b>FIKGLPLFDA</b> AGTHVETQTQGCVKITITHIQGKKRRSAIYAPTWG       | 383 |

|      |     |                                                                        |     |
|------|-----|------------------------------------------------------------------------|-----|
| cons | 337 | *: :. : * . ** : ** . : * : * : * * . : : .. : : * : * * * * : . * * : | 420 |
|------|-----|------------------------------------------------------------------------|-----|

**VR9**

**VR10**

|                 |     |                                                                                              |     |
|-----------------|-----|----------------------------------------------------------------------------------------------|-----|
| murine_ChPV_NY  | 386 | PLSWRQCYATDT---PFAPSMVRYRTGGARRTWTNINRDAEG---VHKDFHYREDPYDITSTVPDTRGTATLTD <b>SKATMHP</b> -- | 460 |
| MKDV            | 386 | PLSWRQCYATDT---PFAPSMVRYRTGGARRTWTNINRDAEG---VHKDFHYREDPYDITSTVPDTRGTATLTD <b>SKATMHP</b> -- | 460 |
| rat2            | 399 | PHTWRFTHTIHA---PRVGSVRYRTGGARRTWTNLRAGP-G---LSGTIRVSRSTPYNTNSTYATTATTRTPTSTRMNY--            | 472 |
| Desmodus_rotond | 386 | PLAWTQIYSIDA---PRAPNAVRYRTGGARRTWTNIEKES-G---E-SPYNIREDPYSTSTYDRSITSNTETISKQIR---            | 457 |
| porcine7        | 397 | PEM---THGINS---AFVLPPVRYRTGGARRSWQARTRDTRDK---EPQQTWYQWNPYMTG-TYSSTTTTSTYTTTTSRK----         | 466 |
| turkey2         | 380 | PLNWRMLYTNQPNRFNFRHSYVRYRTAGARLTWQNAQAGTEETNPASTIDVSHPRTSPIASSTN--TRMTTTFMTLEPRMSPVV         | 461 |
| pit_viper       | 384 | PFNWRHLYASDKQSRFTQNSYVRYRTGGARRTMTNYSLWP-T---PGSVDNPREPPYTTAKWTAATQTQGRVTPPTSVTK--           | 460 |

|      |     |                               |     |
|------|-----|-------------------------------|-----|
| cons | 421 | * : . ***** . * * : : * * : . | 504 |
|------|-----|-------------------------------|-----|

|                 |     |                                                           |     |
|-----------------|-----|-----------------------------------------------------------|-----|
| murine_ChPV_NY  | 461 | -YEQAASGMV <b>LNHKEMRQVRAAAEATR</b> -----SQPAVA-MQTQ----- | 496 |
| MKDV            | 461 | -YEQAASGMV <b>LNHKEMRQVRAAAEATR</b> -----SQPAVA-MQTQ----- | 496 |
| rat2            | 473 | -----                                                     | 472 |
| Desmodus_rotond | 458 | -YRQMVN-----KRD-RT-----AETAVTMMDLQLPPNL-----              | 484 |
| porcine7        | 467 | -----                                                     | 466 |
| turkey2         | 462 | TYDKES-----GEATIREPPIATHRKARRPPNIP-CSTEEAMLISLDQ          | 503 |
| pit_viper       | 461 | -LVQALA-----SR-----GKMATP-----                            | 474 |

|      |     |  |     |
|------|-----|--|-----|
| cons | 505 |  | 563 |
|------|-----|--|-----|

# B

**VR1**

|                 |   |                                                                                       |    |
|-----------------|---|---------------------------------------------------------------------------------------|----|
| rat2            | 1 | MATDVSFSNVFMAYWSNSPYNKVSGAG---RDHTRPTGTPINTGWHILPLTLWKHFHTAKQWAELVINYEAYTVKGFSCSTVYN  | 81 |
| Desmodus_rotond | 1 | MAEDVSYTNTYMAYWKNQPYIYPNNDTDPKSKTGQVMSTGEINTGWHIIPITLWKHFHTPKQWCNFMIKYEAYTVKGYTVTVYN  | 84 |
| porcine7        | 1 | MAEHITLSNTFMAYWENDPYQYPTYKPF-----QKNEILTNTGWHILLNLRWFHFLSPKQWYELCINYEAYHVEGTSTTVFN    | 78 |
| turkey2         | 1 | MADDISFSHSYMCYIKNQPYLYPTQKNP-----TMPQESTLNTGWHIIPITLWKHFCTPADWVDLITHYEAYSVTGYSVSI FN  | 78 |
| pit_viper       | 1 | MATDHVFTNTYMCYWENKPYLYPANQPG-----VKRDGDVYVTGWHIIPNMLWRHVTTPKQWAEFQIQTEAYHVKSIIKAI VYN | 78 |
| Gulf_pipefish   | 1 | M---KFSNSYAYIENQKNDYPDIGLE-----RNPSEYQTGYHRI PNQYWASFLT PKDWFNLIYNNKAFRVVGARCTVSN     | 72 |
| ChPV.3L_hes     | 1 | MT--LSFENISYAYIENAFYKYPTVNNT-----AMTYQITGWHVIPNQEYDDFLNLKQWTELIM-HKTFSPKSV EITVQN     | 72 |
| ChPV.2L_hes     | 1 | MS--ITFENINLYIENASYQYPKDNNI-----TMTYLNNGWHLIPNQEYDDYDLTHKQWTQLIM-HKTYAPKXVEITVQN      | 72 |

|      |   |                                         |    |
|------|---|-----------------------------------------|----|
| cons | 1 | * : * . * * : * : * : * : * : * : * : * | 84 |
|------|---|-----------------------------------------|----|

**VR2 - DE loop**

|                 |    |                                                                                       |     |
|-----------------|----|---------------------------------------------------------------------------------------|-----|
| rat2            | 82 | PVPMTQQLA-----I                                                                       | 91  |
| Desmodus_rotond | 85 | PIPMTQQLA-----I                                                                       | 94  |
| porcine7        | 79 | PIPITNNLP-----I                                                                       | 88  |
| turkey2         | 79 | MTPMTTQIA-----I                                                                       | 88  |
| pit_viper       | 79 | PVPMTTQLA-----I                                                                       | 88  |
| Gulf_pipefish   | 73 | MIPLTEQAA-----I                                                                       | 82  |
| ChPV.3L_hes     | 73 | LIPITTQTA-----I                                                                       | 82  |
| ChPV.2L_hes     | 73 | LIPITTQIAINIXCYLLMFNRAXGPKLYFVTSYQFVSTIYLPCCKHDGGALTDLVEVWSILGVGETVN LKVVQSGLSPHSYVCI | 156 |

|      |    |                                           |     |
|------|----|-------------------------------------------|-----|
| cons | 85 | * : * : . : * : * : * : * : * : * : * : * | 168 |
|------|----|-------------------------------------------|-----|

|                 |     |                                                                                      |            |               |  |
|-----------------|-----|--------------------------------------------------------------------------------------|------------|---------------|--|
|                 |     | <b>VR3</b>                                                                           | <b>VR4</b> | <b>VR5...</b> |  |
| rat2            | 92  | QGTTTFTAFNNTIYSLGVKDELYETSWYNWNPAGTGGFNNSLAYKEGYLDS-----PRAATQKRTLLPVYWKSPTEPLN      | 169        |               |  |
| Desmodus_rotond | 95  | QGTTAFTAFNNTIYTLGAQDDIYETSYHNWYLD---TPFNHFNLAYKEGQYKDN-----NNSWNKTVFPVYSWRTANPRNV    | 167        |               |  |
| porcine7        | 89  | QGTSTFTAFNNTIYSLGASDDLYETGYQNWYED---TLWRSWYVAYKEGLVPKPTTATKEGVGNSWSRLTLPYTLWSAPITAPE | 169        |               |  |
| turkey2         | 89  | QGTNTFTAFNNTIYALGYTDEMCEGTGFNWNYSSE---YDSPNLSLHEGLGKRH-----DDTSYRYELPIYLWPKPHVRVT    | 160        |               |  |
| pit_viper       | 89  | QGSTVFTAFNNTIYSLGYTDTLYETDWFNWNWSPAS-DHIDLNLAYKEGLARTV-----NGTTTRYILPTYLWRAQNARMA    | 163        |               |  |
| Gulf_pipefish   | 83  | QGNTTITTFNNTIYALCYTDNNYETEWEEPA-----RDLSEFMWREGLTN-----GARHMLPTYKHGIYRT---           | 143        |               |  |
| ChPV.3L_hes     | 83  | QGTTTFSAFNNTIYALGYTDTKYETEFFEYSG-----TNTNIEQREGYNT-----ETNTRVSLPLYNHPTSN----         | 144        |               |  |
| ChPV.2L_hes     | 157 | QGTTTFAAFNNTIYVLGYTDTKYETEFFXFKN-----TNINIENRESINT-----ETNTRVTLTVFQLPEVN----         | 218        |               |  |

|      |     |                                                                |     |
|------|-----|----------------------------------------------------------------|-----|
| cons | 169 | ** . . . . . : : * * * * * * * * * * * : * : * : * : * : * : * | 252 |
|------|-----|----------------------------------------------------------------|-----|

|                 |     |                                                                                      |             |             |  |
|-----------------|-----|--------------------------------------------------------------------------------------|-------------|-------------|--|
|                 |     | <b>...VR5</b>                                                                        | <b>VR6A</b> | <b>VR6B</b> |  |
| rat2            | 170 | SVVTWTWDQ-EYNSAAAGLIGNVAWPITG---TNTISL-PDGVFWDPLTSPDDIMELRPGKNSMTWSWERHDCDENKWNIDQL  | 248         |             |  |
| Desmodus_rotond | 168 | SDTTYSYIP-T-----VLSYSTWPRVA---NESDI-PNGLFWDPLTDPDSIMELRPGKNSMSFSWNAHDCDTNKWYNLD CI   | 238         |             |  |
| porcine7        | 170 | TNWTWTWNT-NK----PYPTAGTTWAHTDAG-TEQVVA-PARCFWDPFTNTDSIQELRPGKNAMSFHWKTHAADEHCWYNLDSL | 246         |             |  |

|               |     |                                                                                                                    |     |
|---------------|-----|--------------------------------------------------------------------------------------------------------------------|-----|
| turkey2       | 161 | SQRTMGDWPYN-----TEGYTTWPKNQNNDDTNGI-PTGLIWDPFNMPKMLQELRPGKNAISFSWHPHDCDQNKWYNLDQI                                  | 236 |
| pit_viper     | 164 | SFDSWATEP-N-----MSAYPVYPIGGKVSASEGEQ-PSGVFWDPFNRPNHITELRPGKNAIQYVWENHGCDGDIWFNMDHI                                 | 238 |
| Gulf_pipefish | 144 | -----TTSQAHNVFYGWDPLCKAENILELRPGKNAVTFEWH-----KEE IWLNTHMM                                                         | 191 |
| ChPV.3L_hes   | 145 | -----N-KTFLFWDPLLNPNDIMELRPGKNAIKYSWHRSSADDHIVYNTSGL                                                               | 190 |
| ChPV.2L_hes   | 219 | -----N-KTMLYWGPLINPSEIMELRPGKNAIKYTWHRV-YDELDRHNL---                                                               | 260 |
| cons          | 253 | 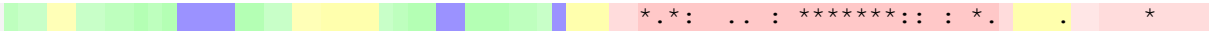 *. *: . . : ***** : : * . * . * | 336 |

**VR7**

|                 |     |                                                                                                    |     |
|-----------------|-----|----------------------------------------------------------------------------------------------------|-----|
| rat2            | 249 | ARWAPYTAD-MPWWNLGRI----GGAGSYQPD-DIEDPKLSLGP-RYG-TNPATEDY-TIPNLANMPIVPAVWWWIEMQKSIVG               | 323 |
| Desmodus_rotond | 239 | AKWTPYVHD-NPFQHIGRA----GQAGSYKIT-TTDDPDLSTYSSWATTELTKDDF-TIPNLLNMPVPMNWWWQEMQKSIAQ                 | 315 |
| porcine7        | 247 | VKLFPPYTP-E-SGYSHNIREKTYQGPPGTRIVNENFQHPPTQTSISSDQ--SKVFIEH-DVPNILTAPSVPIHWFWIELEARNLIE            | 326 |
| turkey2         | 237 | AWWWPYAAP-SPYPNNN-----RPQTSQLSTQC-DPDRLOSK--YE--NTNPGDY-TMPDMSLMPITPTGWWWKEMQSS IIL                | 306 |
| pit_viper       | 239 | ASFSPYFGD-HPWDSFS-A----GFPGSYKLNQNADDPEFLS-P--YMTAPTNRNWTIPNLANMPIVPTGWFWEKVESIAL                  | 312 |
| Gulf_pipefish   | 192 | QQFDPTHTP-GI-ANTA-----TVY-----SQEIHNQTHSNVTPHSHLNRWISQTD TAPAT                                     | 240 |
| ChPV.3L_hes     | 191 | FTLDPTFNSENM-----LMDF-DRRNTNVTPYQQHQHWLKSNTHTGFGQ                                                  | 233 |
| ChPV.2L_hes     | 261 | -NITP-----YLHHQHWIHRNQTEFGR                                                                        | 281 |
| cons            | 337 | 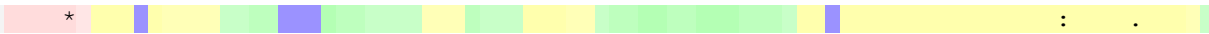 * . . . . . : . | 420 |

**VR8**

**HI-loop**

**VR9...**

|                 |     |                                                                                                                        |     |
|-----------------|-----|------------------------------------------------------------------------------------------------------------------------|-----|
| rat2            | 324 | TYDDNSSPQKEEALYGPTEYEYQYKYPPTQC <b>FIKGLPLFD</b> DDGNHISTTTQGC FKVTLHLAALKRRSRIYAPTWHPHTWR-FTH                         | 406 |
| Desmodus_rotond | 316 | TTT-----LKKPALFWAGTEYEYQYKYPPTQC <b>FLKGVPLFD</b> DNTHVETLTQGC FRVTLHLAALKRRSRIFAPTWGPLAWT-QIY                         | 393 |
| porcine7        | 327 | DKK-----VEKQQLGWPGTEWATPKYPPMNN <b>FIKGIPLTDE</b> NETLVKTI TMGCFRNGIHLSCKKRRSRMFAPTWGPEM----TH                         | 401 |
| turkey2         | 307 | SPGE--YFSSRPDLFFAGTEYEFKYPTMQH <b>FIKI IPLFDS</b> QGNHIDISANISVRTTLHLKCKKRRSAYFCPTYGPLNWR-MLY                          | 387 |
| pit_viper       | 313 | TQD----PTTIPELMAAQTEYQYKYPPTQW <b>FIKGLPLFDA</b> AAGTHVETQTQGCVKIT IHIQKKRRSAIYAPTWGPFNWR-HLY                          | 391 |
| Gulf_pipefish   | 241 | ARH-----WSKQAIQRPGIMEQQFRYPIPNW <b>FIKMIPLFDS</b> QNNLIKTTAQVLTIMELTVDTI PQSLAINMPI IDDI I-----                        | 314 |
| ChPV.3L_hes     | 234 | -----HFQYQMSGLYQNNFTKPIPN <b>FIKMIPLFDE</b> NNALINTTAQIC IHKKITFDVTPLDASLNRP I I PSMLYDNEFY                            | 307 |
| ChPV.2L_hes     | 282 | -----QFN YQMSGMPENNFFKSI PN <b>FIKMIPLFDE</b> NNALINTTAQVC IHRKITFDIEPLFSSINRPLAPENMYNTPLY                             | 355 |
| cons            | 421 |  . . . : * : * : * * . . : . : . * | 504 |

**...VR9**

**VR10**

|                 |     |                                                                                     |     |
|-----------------|-----|-------------------------------------------------------------------------------------|-----|
| rat2            | 407 | TIHAP---RVGSYVR-----YRTGGARRTWTNLRAGP--GLSG---TIRVSRTPYNTNSTYATTATTRTT--            | 463 |
| Desmodus_rotond | 394 | SIDAP---RAPNAV-----YRTGGARRTWTNIEKES--G-ES---PYNIREDPYSTSTTYDRSITSNTE--             | 449 |
| porcine7        | 402 | GINSA---FVLPVVR-----YRTGGARRSWQARTRDT--RDKEPQ-QTWYQWNPYMTGT-YSTTTTSTY--             | 459 |
| turkey2         | 388 | TNQPNRFNFRHSYVR-----YRTAGARLTWQONQAGTEETNPASTIDVSHPRTPSPYIASSTNTRMTTTFMTLE          | 454 |
| pit_viper       | 392 | ASDKQSRTFQNSYVR-----YRTGGARRTMTNYS LW--PTPGS---VDNPREPPYTTAKWTAATQTQGRVTQ           | 453 |
| Gulf_pipefish   | 315 | -----A--PNH-----TPNSVPYCMFRY-QPIIPINVG--                                            | 338 |
| ChPV.3L_hes     | 308 | TTNYKGITFH-AHAAYQHNIQKLDQMTAKQEKKINGKILTWP IYYEAP---KD---KIKNDFFPWVTQTERNNELI-HLG-- | 380 |
| ChPV.2L_hes     | 356 | TQKY-----NLYQSLSIYA-----                                                            | 369 |

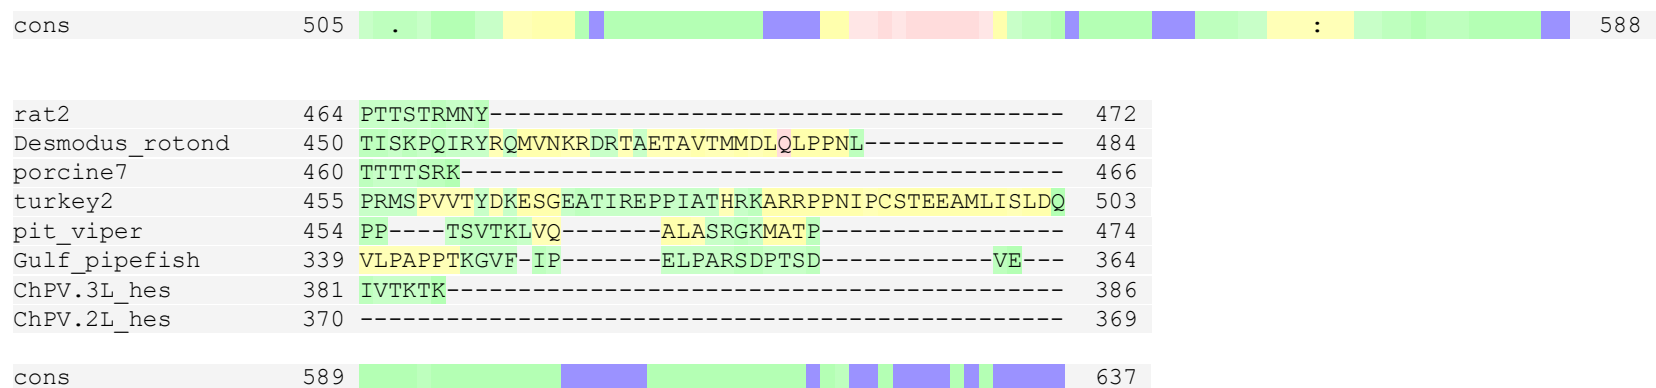

**Figure S3**

Variable regions at the derived amino acid sequence level identified among chapparvovirus capsid proteins. (A) Alignment of amniote chapparvovirus capsid protein ORF (VP) derived amino acid sequences, containing both isolates of murine origin. Variable regions (VRs) are marked by the black bars and coloring is based on sequence similarity (red = highly similar, blue = not similar). The conserved loops making up the fivefold symmetry axes of the capsid are highlighted in bold. (B) The same alignment incorporating the complete VP protein sequences of all novel chapparvovirus sequences reported in this study.
